# Supplementary material
Source: PubMed Central journal article supplement (PMC6614061)
Supplement: NIHMS1527417-supplement-2.pdf [file NIHMS1527417-supplement-2.pdf]

## Supplementary Note 1

We hypothesize that knocking down and overexpressing Mitofusin and Drp1 affect selection by altering mitochondrial connectivity. Functions other than fusion and fission have been proposed for both Mitofusin and Drp1. For example, Mitofusin modulates the tethering of mitochondria to the ER and is essential for the trafficking of mitochondria along axons (reviewed in Filadi et al. 2018). However, to our knowledge, only for their role in mediating mitochondrial connectivity via fusion and fission do Mitofusin and Drp1 have opposite functions. To further confirm that our manipulations of Mitofusin and Drp1 are affecting selection via their effects on mitochondrial connectivity, we overexpressed Mitofusin or Drp1 in ovaries of wildtype homoplasmic *Drosophila melanogaster* flies and measured mtDNA copy number (as an approximation for mtDNA replication), ATP levels (as an indicator of mitochondrial function), and mitochondrial motility. If the effects we observed on selection are due to changes in replication, mitochondrial function or motility we would expect overexpression of Mitofusin or Drp1 to oppositely affect these parameters, similar to their effect on selection. This is not what we find. The overexpression of Mitofusin and Drp1 had similar effects on mtDNA copy number (Extended Data Fig. 6f), the overexpression of Mitofusin or Drp1 had no significant effect on ATP levels (Extended Data Fig. 6g), and finally, within the limits of our assay overexpression of Mitofusin or Drp1 did not significantly affect mitochondrial motility (Extended Data Fig. 6h). In none of these experiments, did we observe the opposing effects upon Mitofusin and Drp1 overexpression that would be expected given the observed effects on selection. Therefore, our results cannot be explained by effects on copy number (mtDNA replication), ATP generation (mitochondrial function) or mitochondrial motility, and are best interpreted as being a consequence of altered mitochondrial connectivity.

## Supplementary Note 2

### References for Supplementary Note 1 and Supplementary Table 1

Buszczak, M., Paterno, S., Lighthouse, D., Bachman, J., Planck, J., Owen, S., Skora, A.D., Nystul, T.G., Ohlstein, B., Allen, A., et al. (2007). The carnegie protein trap library: a versatile tool for *Drosophila* developmental studies. *Genetics* 175, 1505–1531.

Dietzl, G., Chen, D., Schnorrer, F., Su, K.-C., Barinova, Y., Fellner, M., Gasser, B., Kinsey, K., Oppel, S., Scheiblauer, S., et al. (2007). A genome-wide transgenic RNAi library for conditional gene inactivation in *Drosophila*. *Nature* 448, 151–156.

Fernandez-Ayala, D.J.M., Sanz, A., Vartiainen, S., Kemppainen, K.K., Babusiak, M., Mustalahti, E., Costa, R., Tuomela, T., Zeviani, M., Chung, J., et al. (2009). Expression of the *Ciona intestinalis* Alternative Oxidase (AOX) in *Drosophila* Complements Defects in Mitochondrial Oxidative Phosphorylation. *Cell Metabolism* 9, 449–460.

Filadi, R., Pendin, D. & Pizzo, P. Mitofusin 2: from functions to disease. *Cell Death Dis* 9, 330 (2018).

Hay, B.A., Wolff, T., and Rubin, G.M. (1994). Expression of baculovirus P35 prevents cell death in *Drosophila*. *Development* 120, 2121–2129.

Hayashi, S., Ito, K., Sado, Y., Taniguchi, M., Akimoto, A., Takeuchi, H., Aigaki, T., Matsuzaki, F., Nakagoshi, H., Tanimura, T., et al. (2002). GETDB, a database compiling expression patterns and molecular locations of a collection of gal4 enhancer traps. *Genesis* 34, 58–61.

Hill, J.H., Chen, Z., and Xu, H. (2014). Selective propagation of functional mitochondrial DNA during oogenesis restricts the transmission of a deleterious mitochondrial variant. *Nat Genet* 46, 389–392.

Hurd, T.R., Herrmann, B., Sauerwald, J., Sanny, J., Grosch, M., and Lehmann, R. (2016). Long Oskar Controls Mitochondrial Inheritance in *Drosophila melanogaster*. *Dev Cell* 39, 560–571.

LaJeunesse, D.R., Buckner, S.M., Lake, J., Na, C., Pirt, A., and Fromson, K. (2004). Three new *Drosophila* markers of intracellular membranes. *BioTechniques* 36, 784–8–790.

Ma, H., Xu, H., and O'Farrell, P.H. (2014). Transmission of mitochondrial mutations and action of purifying selection in *Drosophila melanogaster*. *Nat Genet* 46, 393–397.

McKearin, D., and Ohlstein, B. (1995). A role for the *Drosophila* bag-of-marbles protein in the differentiation of cystoblasts from germline stem cells. *Development* 121, 2937–2947.

Ni, J.-Q., Zhou, R., Czech, B., Liu, L.-P., Holderbaum, L., Yang-Zhou, D., Shim, H.-S., Tao, R., Handler, D., Karpowicz, P., et al. (2011). A genome-scale shRNA resource for transgenic RNAi in *Drosophila*. *Nat Meth* 8, 405–407.

Ohlstein, B., and McKearin, D. (1997). Ectopic expression of the *Drosophila* Bam protein eliminates oogenic germline stem cells. *Development* *124*, 3651–3662.

Park, J., Kim, Y., Choi, S., Koh, H., Lee, S.-H., Kim, J.-M., and Chung, J. (2010). *Drosophila* Porin/VDAC affects mitochondrial morphology. *PLoS ONE* *5*, e13151.

Sandoval, H., Yao, C.-K., Chen, K., Jaiswal, M., Donti, T., Lin, Y.Q., Bayat, V., Xiong, B., Zhang, K., David, G., et al. (2014). Mitochondrial fusion but not fission regulates larval growth and synaptic development through steroid hormone production. *eLIFE* *3*, e03558.

Tracey, W.D., Ning, X., Klingler, M., Kramer, S.G., and Gergen, J.P. (2000). Quantitative analysis of gene function in the *Drosophila* embryo. *Genetics* *154*, 273–284.

Yun, J., Puri, R., Yang, H., Lizzio, M.A., Wu, C., Sheng, Z.-H., and Guo, M. (2014). MUL1 acts in parallel to the PINK1/parkin pathway in regulating mitofusin and compensates for loss of PINK1/parkin. *eLIFE* *3*, e01958.
