# Supplementary material
Source: PubMed Central journal article supplement (PMC6614061)
Supplement: NIHMS1527417-supplement-3.pdf [file NIHMS1527417-supplement-3.pdf]

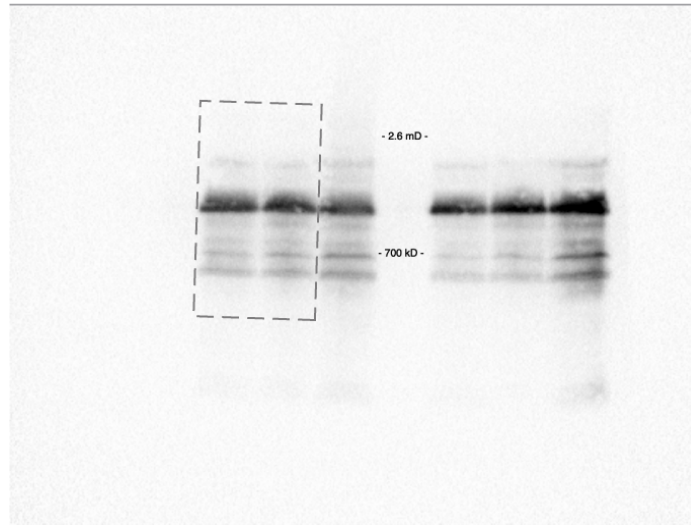

**Supplementary Figure 1. Gel source data for Extended Data Figure 9g.** Blue Native Polyacrylamide Gel illustrating that expression of the dominant negative inhibitor of complex V (CV-DN) does not disrupt the Complex V dimer.
